# Supplementary material for: Genetic structure and diversity of Mycoplasma hyopneumoniae based on a MLVA typing scheme
Source: Front Vet Sci. 2025 Jan 15;11:1510825. doi: 10.3389/fvets.2024.1510825 (PMC11776303; doi:10.3389/fvets.2024.1510825)
Supplement: Supplementary file 1 [file Data_Sheet_1.XLSX]

## Sheet: VNTR types by country
Number of Matches and percentage of VNTR types by country
Number of Matches	Percentage	VNTR type		Country
		p97R1	p146R3	Argentina	Brazil	Mexico	USA	Belgium	Spain
67	8.40652	9	15	0	1	0	66	0	0
59	7.40276	11	21	0	27	1	31	0	0
52	6.52447	12	14	0	48	0	4	0	0
27	3.3877	13	17	0	0	0	27	0	0
26	3.26223	9	20	0	0	0	2	0	24
23	2.88582	16	24	0	0	0	23	0	0
19	2.38394	8	16	18	0	0	1	0	0
17	2.133	9	26	0	0	1	16	0	0
14	1.75659	10	18	0	6	8	0	0	0
13	1.63112	3	17	0	12	0	1	0	0
13	1.63112	15	25	0	0	0	13	0	0
12	1.50565	6	15	6	0	0	6	0	0
12	1.50565	14	21	0	0	0	11	0	1
11	1.38018	12	17	0	0	0	4	6	1
11	1.38018	15	21	0	0	0	11	0	0
10	1.25471	11	26	10	0	0	0	0	0
10	1.25471	11	15	0	0	0	10	0	0
10	1.25471	11	46	0	0	0	0	0	10
10	1.25471	12	15	0	5	0	5	0	0
9	1.12923	3	14	0	9	0	0	0	0
9	1.12923	3	15	0	0	0	9	0	0
9	1.12923	9	44	0	9	0	0	0	0
8	1.00376	3	24	0	8	0	0	0	0
8	1.00376	7	15	0	1	0	7	0	0
7	0.878294	8	22	0	0	0	7	0	0
7	0.878294	9	42	0	7	0	0	0	0
7	0.878294	9	24	0	4	0	2	1	0
7	0.878294	10	20	0	0	0	7	0	0
7	0.878294	13	18	0	0	0	7	0	0
6	0.752823	7	27	0	2	0	4	0	0
6	0.752823	8	17	4	0	0	0	1	1
6	0.752823	11	25	5	0	0	0	1	0
6	0.752823	11	22	0	0	0	5	0	1
6	0.752823	13	25	6	0	0	0	0	0
5	0.627353	9	12	0	0	0	5	0	0
5	0.627353	9	22	0	0	2	2	0	1
5	0.627353	10	19	0	0	4	1	0	0
5	0.627353	11	29	5	0	0	0	0	0
5	0.627353	12	13	0	1	0	3	0	1
4	0.501882	7	24	0	4	0	0	0	0
4	0.501882	7	25	0	1	0	3	0	0
4	0.501882	7	34	0	1	0	0	3	0
4	0.501882	9	21	0	1	2	1	0	0
4	0.501882	9	27	0	0	0	2	2	0
4	0.501882	10	14	0	4	0	0	0	0
4	0.501882	10	17	0	1	3	0	0	0
4	0.501882	10	16	0	2	0	2	0	0
4	0.501882	16	18	0	0	0	4	0	0
4	0.501882	16	25	0	0	0	4	0	0
3	0.376412	3	44	0	3	0	0	0	0
3	0.376412	4	11	0	0	0	3	0	0
3	0.376412	6	16	3	0	0	0	0	0
3	0.376412	8	20	0	0	0	3	0	0
3	0.376412	8	32	0	1	0	0	0	2
3	0.376412	8	41	0	1	0	0	1	1
3	0.376412	9	45	0	3	0	0	0	0
3	0.376412	10	26	3	0	0	0	0	0
3	0.376412	11	13	0	0	0	2	1	0
3	0.376412	12	38	0	3	0	0	0	0
3	0.376412	12	20	0	0	0	3	0	0
3	0.376412	12	16	0	0	0	3	0	0
3	0.376412	12	24	0	0	0	3	0	0
3	0.376412	15	18	0	0	0	3	0	0
3	0.376412	15	17	0	0	0	3	0	0
3	0.376412	16	19	0	0	0	3	0	0
3	0.376412	17	18	0	0	0	3	0	0
3	0.376412	17	21	0	0	0	3	0	0
2	0.250941	4	22	0	0	0	2	0	0
2	0.250941	4	19	0	0	0	2	0	0
2	0.250941	7	16	0	0	0	2	0	0
2	0.250941	7	23	0	1	0	1	0	0
2	0.250941	8	14	2	0	0	0	0	0
2	0.250941	8	35	0	0	0	0	0	2
2	0.250941	8	21	0	0	0	0	0	2
2	0.250941	9	43	0	2	0	0	0	0
2	0.250941	9	23	0	1	1	0	0	0
2	0.250941	9	10	0	0	0	2	0	0
2	0.250941	9	18	0	0	0	0	2	0
2	0.250941	10	22	0	0	0	2	0	0
2	0.250941	10	43	0	0	0	0	2	0
2	0.250941	10	23	0	0	0	0	1	1
2	0.250941	11	35	0	2	0	0	0	0
2	0.250941	11	16	1	0	0	1	0	0
2	0.250941	11	23	0	0	0	2	0	0
2	0.250941	11	20	0	0	0	2	0	0
2	0.250941	11	45	0	0	0	0	0	2
2	0.250941	11	47	0	0	0	0	0	2
2	0.250941	12	33	0	2	0	0	0	0
2	0.250941	12	35	0	2	0	0	0	0
2	0.250941	12	32	0	2	0	0	0	0
2	0.250941	12	34	0	2	0	0	0	0
2	0.250941	12	11	0	0	0	2	0	0
2	0.250941	12	18	0	0	0	1	1	0
2	0.250941	12	12	0	0	0	1	0	1
2	0.250941	12	26	0	0	0	1	0	1
2	0.250941	13	33	0	2	0	0	0	0
2	0.250941	13	22	0	0	0	2	0	0
2	0.250941	13	16	0	0	0	2	0	0
2	0.250941	14	18	0	0	0	2	0	0
2	0.250941	14	39	0	0	0	0	2	0
2	0.250941	16	26	0	0	0	2	0	0
2	0.250941	16	21	0	0	0	2	0	0
2	0.250941	17	20	0	0	0	2	0	0
1	0.125471	1	15	0	0	0	0	1	0
1	0.125471	1	24	0	0	0	0	1	0
1	0.125471	2	29	0	1	0	0	0	0
1	0.125471	2	10	0	0	0	1	0	0
1	0.125471	3	43	0	1	0	0	0	0
1	0.125471	3	27	0	0	0	1	0	0
1	0.125471	4	17	0	0	0	1	0	0
1	0.125471	5	21	0	0	1	0	0	0
1	0.125471	5	20	0	0	1	0	0	0
1	0.125471	5	15	0	0	0	1	0	0
1	0.125471	5	11	0	0	0	1	0	0
1	0.125471	6	33	0	1	0	0	0	0
1	0.125471	6	14	0	0	0	1	0	0
1	0.125471	6	23	0	0	0	1	0	0
1	0.125471	6	11	0	0	0	1	0	0
1	0.125471	7	33	0	1	0	0	0	0
1	0.125471	7	22	0	1	0	0	0	0
1	0.125471	7	32	0	1	0	0	0	0
1	0.125471	7	26	0	1	0	0	0	0
1	0.125471	7	35	0	1	0	0	0	0
1	0.125471	7	28	0	0	0	1	0	0
1	0.125471	7	21	0	0	0	1	0	0
1	0.125471	7	44	0	0	0	0	1	0
1	0.125471	8	34	0	1	0	0	0	0
1	0.125471	8	15	0	1	0	0	0	0
1	0.125471	8	10	0	0	0	1	0	0
1	0.125471	8	11	0	0	0	1	0	0
1	0.125471	8	13	0	0	0	1	0	0
1	0.125471	8	25	0	0	0	1	0	0
1	0.125471	8	27	0	0	0	1	0	0
1	0.125471	8	36	0	0	0	0	0	1
1	0.125471	8	31	0	0	0	0	0	1
1	0.125471	8	24	0	0	0	0	0	1
1	0.125471	8	40	0	0	0	0	0	1
1	0.125471	9	17	1	0	0	0	0	0
1	0.125471	9	38	0	1	0	0	0	0
1	0.125471	9	40	0	1	0	0	0	0
1	0.125471	9	11	0	0	0	1	0	0
1	0.125471	9	19	0	0	0	1	0	0
1	0.125471	9	25	0	0	0	1	0	0
1	0.125471	10	25	1	0	0	0	0	0
1	0.125471	10	24	0	1	0	0	0	0
1	0.125471	10	15	0	0	0	1	0	0
1	0.125471	10	27	0	0	0	1	0	0
1	0.125471	10	41	0	0	0	0	1	0
1	0.125471	11	32	0	1	0	0	0	0
1	0.125471	11	11	0	0	0	1	0	0
1	0.125471	11	12	0	0	0	1	0	0
1	0.125471	11	17	0	0	0	0	0	1
1	0.125471	11	40	0	0	0	0	0	1
1	0.125471	11	38	0	0	0	0	0	1
1	0.125471	11	42	0	0	0	0	0	1
1	0.125471	11	43	0	0	0	0	0	1
1	0.125471	12	48	0	1	0	0	0	0
1	0.125471	12	31	0	1	0	0	0	0
1	0.125471	12	21	0	0	0	1	0	0
1	0.125471	12	22	0	0	0	0	1	0
1	0.125471	12	30	0	0	0	0	0	1
1	0.125471	13	21	0	0	1	0	0	0
1	0.125471	13	23	0	0	0	1	0	0
1	0.125471	13	15	0	0	0	1	0	0
1	0.125471	13	19	0	0	0	1	0	0
1	0.125471	13	14	0	0	0	0	0	1
1	0.125471	14	14	0	1	0	0	0	0
1	0.125471	14	17	0	0	0	1	0	0
1	0.125471	14	23	0	0	0	1	0	0
1	0.125471	14	19	0	0	0	1	0	0
1	0.125471	14	20	0	0	0	1	0	0
1	0.125471	15	28	0	0	0	0	1	0
1	0.125471	15	34	0	0	0	0	1	0
1	0.125471	15	30	0	0	0	0	0	1
1	0.125471	15	32	0	0	0	0	0	1
1	0.125471	15	39	0	0	0	0	0	1
1	0.125471	16	27	0	0	0	1	0	0
1	0.125471	16	20	0	0	0	1	0	0
1	0.125471	17	15	0	0	0	1	0	0
1	0.125471	17	17	0	0	0	1	0	0
1	0.125471	17	32	0	0	0	0	0	1
1	0.125471	18	21	0	0	0	1	0	0
1	0.125471	18	24	0	0	0	1	0	0
1	0.125471	19	18	0	0	0	1	0	0
1	0.125471	20	18	0	0	1	0	0	0
Total				65	198	26	408	31	69
Shading indicates unique alleles
