# Supplementary material for: Genetic structure and diversity of Mycoplasma hyopneumoniae based on a MLVA typing scheme
Source: Front Vet Sci. 2025 Jan 15;11:1510825. doi: 10.3389/fvets.2024.1510825 (PMC11776303; doi:10.3389/fvets.2024.1510825)
Supplement: Supplementary file 2 [file Data_Sheet_2.DOCX]

**Supplementary Table S2**. Allele frequencies by country (populations) for the p97R1 and p146R3 loci.

| **Locus** | **Allele**  **(TR)** | **Argentina** | **Brazil** | **Mexico** | **USA** | **Belgium** | **Spain** |
| --- | --- | --- | --- | --- | --- | --- | --- |
| ***p97*R1** | **1** | 0,000 | 0,000 | 0,000 | 0,000 | 0,065 | 0,000 |
| **2** | 0,000 | 0,005 | 0,000 | 0,002 | 0,000 | 0,000 |
| **3** | 0,000 | 0,167 | 0,000 | 0,027 | 0,000 | 0,000 |
| **4** | 0,000 | 0,000 | 0,000 | 0,020 | 0,000 | 0,000 |
| **5** | 0,000 | 0,000 | 0,077 | 0,005 | 0,000 | 0,000 |
| **6** | 0,138 | 0,005 | 0,000 | 0,022 | 0,000 | 0,000 |
| **7** | 0,000 | 0,076 | 0,000 | 0,047 | 0,129 | 0,000 |
| **8** | 0,369 | 0,020 | 0,000 | 0,039 | 0,065 | 0,174 |
| **9** | 0,015 | 0,152 | 0,231 | 0,248 | 0,161 | 0,362 |
| **10** | 0,062 | 0,071 | 0,577 | 0,034 | 0,129 | 0,014 |
| **11** | 0,323 | 0,152 | 0,038 | 0,135 | 0,065 | 0,290 |
| **12** | 0,000 | 0,338 | 0,000 | 0,076 | 0,258 | 0,072 |
| **13** | 0,092 | 0,010 | 0,038 | 0,100 | 0,000 | 0,014 |
| **14** | 0,000 | 0,005 | 0,000 | 0,042 | 0,065 | 0,014 |
| **15** | 0,000 | 0,000 | 0,000 | 0,074 | 0,065 | 0,043 |
| **16** | 0,000 | 0,000 | 0,000 | 0,098 | 0,000 | 0,000 |
| **17** | 0,000 | 0,000 | 0,000 | 0,025 | 0,000 | 0,014 |
| **18** | 0,000 | 0,000 | 0,000 | 0,005 | 0,000 | 0,000 |
| **19** | 0,000 | 0,000 | 0,000 | 0,002 | 0,000 | 0,000 |
| **20** | 0,000 | 0,000 | 0,038 | 0,000 | 0,000 | 0,000 |
| ***p146*R3** | **10** | 0,000 | 0,000 | 0,000 | 0,010 | 0,000 | 0,000 |
| **11** | 0,000 | 0,000 | 0,000 | 0,025 | 0,000 | 0,000 |
| **12** | 0,000 | 0,000 | 0,000 | 0,017 | 0,000 | 0,014 |
| **13** | 0,000 | 0,005 | 0,000 | 0,015 | 0,032 | 0,014 |
| **14** | 0,031 | 0,313 | 0,000 | 0,012 | 0,000 | 0,014 |
| **15** | 0,092 | 0,040 | 0,000 | 0,262 | 0,032 | 0,000 |
| **16** | 0,338 | 0,010 | 0,000 | 0,027 | 0,000 | 0,000 |
| **17** | 0,077 | 0,066 | 0,115 | 0,093 | 0,226 | 0,043 |
| **18** | 0,000 | 0,030 | 0,346 | 0,051 | 0,097 | 0,000 |
| **19** | 0,000 | 0,000 | 0,154 | 0,022 | 0,000 | 0,000 |
| **20** | 0,000 | 0,000 | 0,038 | 0,051 | 0,000 | 0,348 |
| **21** | 0,000 | 0,141 | 0,192 | 0,152 | 0,000 | 0,043 |
| **22** | 0,000 | 0,005 | 0,077 | 0,049 | 0,032 | 0,029 |
| **23** | 0,000 | 0,010 | 0,038 | 0,015 | 0,032 | 0,014 |
| **24** | 0,000 | 0,086 | 0,000 | 0,071 | 0,065 | 0,014 |
| **25** | 0,185 | 0,005 | 0,000 | 0,054 | 0,032 | 0,000 |
| **26** | 0,200 | 0,005 | 0,038 | 0,047 | 0,000 | 0,014 |
| **27** | 0,000 | 0,010 | 0,000 | 0,025 | 0,065 | 0,000 |
| **28** | 0,000 | 0,000 | 0,000 | 0,002 | 0,032 | 0,000 |
| **29** | 0,077 | 0,005 | 0,000 | 0,000 | 0,000 | 0,000 |
| **30** | 0,000 | 0,000 | 0,000 | 0,000 | 0,000 | 0,029 |
| **31** | 0,000 | 0,005 | 0,000 | 0,000 | 0,000 | 0,014 |
| **32** | 0,000 | 0,025 | 0,000 | 0,000 | 0,000 | 0,058 |
| **33** | 0,000 | 0,030 | 0,000 | 0,000 | 0,000 | 0,000 |
| **34** | 0,000 | 0,020 | 0,000 | 0,000 | 0,129 | 0,000 |
| **35** | 0,000 | 0,025 | 0,000 | 0,000 | 0,000 | 0,029 |
| **36** | 0,000 | 0,000 | 0,000 | 0,000 | 0,000 | 0,014 |
| **38** | 0,000 | 0,020 | 0,000 | 0,000 | 0,000 | 0,014 |
| **39** | 0,000 | 0,000 | 0,000 | 0,000 | 0,065 | 0,014 |
| **40** | 0,000 | 0,005 | 0,000 | 0,000 | 0,000 | 0,029 |
| **41** | 0,000 | 0,005 | 0,000 | 0,000 | 0,065 | 0,014 |
| **42** | 0,000 | 0,035 | 0,000 | 0,000 | 0,000 | 0,014 |
| **43** | 0,000 | 0,015 | 0,000 | 0,000 | 0,065 | 0,014 |
| **44** | 0,000 | 0,061 | 0,000 | 0,000 | 0,032 | 0,000 |
| **45** | 0,000 | 0,015 | 0,000 | 0,000 | 0,000 | 0,029 |
| **46** | 0,000 | 0,000 | 0,000 | 0,000 | 0,000 | 0,145 |
| **47** | 0,000 | 0,000 | 0,000 | 0,000 | 0,000 | 0,029 |
| **48** | 0,000 | 0,005 | 0,000 | 0,000 | 0,000 | 0,000 |

Shading indicates *p97*R1 and *p146*R3 alleles found in all countries.
